# 1 Copy number variants in the sheep genome detected using multiple approaches

2

3 Gemma M Jenkins <sup>1\*</sup>

4 \*corresponding author

5 Email: gjenkins@abacusbio.co.nz

6

7 Michael E Goddard <sup>2</sup>

8 Email: mike.goddard@ecodev.vic.gov.au

9

10 Michael A Black <sup>3</sup>

11 Email: mik.black@otago.ac.nz

12

13 Rudiger Brauning <sup>4</sup>

14 Email: rudiger.brauning@agresearch.co.nz

15

16 Benoit Auvray <sup>3</sup>

17 Email: bauvray@maths.otago.ac.nz

18

19 Ken G Dodds <sup>4</sup>

20 Email: ken.dodds@agresearch.co.nz

21

22 James W Kijas <sup>5</sup>

23 Email: james.kijas@csiro.au

24

25 Noelle Cockett <sup>6</sup>

26 Email: noelle.cockett@usu.edu

27

28 John C McEwan <sup>4</sup>

29 Email: john.mcewan@agresearch.co.nz

30

31 <sup>1</sup> AbacusBio Limited, 442 Moray Place, PO Box 5585, Dunedin 9058, NEW ZEALAND

32 <sup>2</sup> Victorian Department of Economic Development, Jobs, Transport and Resources, Bundoora, VIC  
33 3083, AUSTRALIA

34 <sup>3</sup> Department of Biochemistry, University of Otago, 710 Cumberland St, Dunedin 9054, NEW  
35 ZEALAND

36 <sup>4</sup> AgResearch, Invermay Agricultural Centre, PB 50034, Mosgiel 9053, NEW ZEALAND

37 <sup>5</sup> CSIRO Animal, Food and Health Sciences, Queensland Bioscience Precinct, 306 Carmody Road.  
38 St Lucia, QLD 4067, AUSTRALIA

39 <sup>6</sup> Utah State University, 1435 Old Main Hill, Logan, UT 84322-1435-1435, USA

40

41 **Keywords:** sheep, copy number variants, array CGH, SNP, sequence

42

# 43 **Abstract**

44 **Background.** Copy number variants (CNVs) are a type of polymorphism found to underlie phenotypic  
45 variation, both in humans and livestock. Most surveys of CNV in livestock have been conducted in  
46 the cattle genome, and often utilise only a single approach for the detection of copy number  
47 differences. Here we performed a study of CNV in sheep, using multiple methods to identify and  
48 characterise copy number changes. Comprehensive information from small pedigrees (trios) was  
49 collected using multiple platforms (array CGH, SNP chip and whole genome sequence data), with  
50 these data then analysed via multiple approaches to identify and verify CNVs.

51 **Results.** In total, 3,488 autosomal CNV regions (CNVRs) were identified from 30 sheep. The average  
52 length of the identified CNVRs was 19kb (range of 1kb to 3.6Mb), with shorter CNVRs being more  
53 frequent than longer CNVRs. The total length of all CNVRs was 67.6Mbps, which equates to 2.7% of  
54 the sheep autosomes. For individuals this value ranged from 0.24 to 0.55%, and the majority of  
55 CNVRs were identified in single animals. Rather than being uniformly distributed throughout the  
56 genome, CNVRs tended to be clustered. Application of three independent approaches for CNVR  
57 detection facilitated a comparison of validation rates. CNVs identified on the Roche-NimbleGen  
58 2.1M CGH array generally had low validation rates, while whole genome sequence data had the  
59 highest validation rate.

60 **Conclusions.** This study represents the first comprehensive survey of the distribution, prevalence  
61 and characteristics of CNVR in sheep. Multiple approaches were used to detect CNV regions and it  
62 appears that the best method for verifying CNVR on a large scale involves using a combination of  
63 detection methodologies. The characteristics of the 3,488 autosomal CNV regions identified in this  
64 study are comparable to other CNV regions reported in the literature and provide a valuable  
65 addition to the small subset of published sheep CNVs.

66

## 67 Background

68 Copy number variants (CNVs) are a type of genomic polymorphism that potentially underlie a  
69 significant fraction of phenotypic variation [1]. CNVs are structural variants, defined as stretches of  
70 DNA that are greater than 1 kilobase (kb) in size and are duplicated or deleted in the genome of  
71 some individuals [2]. Mutation rate estimates for CNVs vary from  $1.1 \times 10^{-2}$  [3] to  $1 \times 10^{-8}$  per locus per  
72 generation [4, 5], which reflects the diverse processes by which CNVs are created. They can be over  
73 1 megabase (Mb) [6] and are thought to comprise approximately 1% of an individual's genome,  
74 which is much higher than the 0.1% thought to comprise SNPs [7, 8]. CNVs can be present in the  
75 same or overlapping regions of the genome in multiple individuals, these regions are called copy  
76 number variant regions (CNVRs). Copy number variants are distinct from another type of variant,  
77 indels (INsertions/DEletionS), in that indels are typically less than 1kb [2]. By definition they are also  
78 distinct from segmental duplications (SD). Segmental duplications are defined as being over 1kb in  
79 length with at least 90% sequence identity between the duplicated segments and are not  
80 polymorphic in the population [9]. In many cases it is likely that segmental duplications were once  
81 CNVs that have subsequently become fixed in the population.

82  
83 There are many examples, particularly in humans, of CNVs influencing traits. These include multiple  
84 examples of CNVs associated with cancer susceptibility [10-12], the association of the FCGR3B gene  
85 copy number variant with systemic lupus erythematosus (SLE) [13], and CCL3L1 gene copy number,  
86 which has been linked to HIV susceptibility [14]. There is also evidence for CNVs influencing traits in  
87 other animal and livestock species. A 133kb duplication containing four genes causes hair ridge in  
88 Rhodesian and Thai Ridgeback dogs [15]. The chicken Peacomb phenotype is under sexual selection  
89 and is caused by a 3.2 kb duplication in an intron of the SOX5 gene [16]. The Peacomb allele contains  
90 ~30 copies of the duplication, with variation in copy number present within individuals with the  
91 Peacomb phenotype. In pigs, Chen *et al* [17] found seven copy number variable genes that  
92 overlapped quantitative trait loci (QTL) for, among other traits, carcass length, backfat thickness,

93 abdominal fat weight, length of scapular, intramuscular fat content of *longissimus* muscle, body  
 94 weight at 240 days and glycolytic potential of longissimus muscle. Although not an association  
 95 analysis, Chen *et al* [17] identified one CNV that had previously been associated with skin colour in  
 96 pigs [18].

97

98 There have been many CNV studies in cattle, with a range of platforms used to identify CNVs [19-26].  
 99 Between 51 and 1265 CNVRs [20, 22] have been identified in the various cattle studies, with  
 100 estimates of the proportion of the cattle genome thought to contain CNVRs ranging from 0.5 to 20%  
 101 [22, 24]. Although the latter is likely to be an overestimate, the wide range in estimates is likely due  
 102 to a number of factors, including the technology used to detect CNVs, different CNV calling criteria  
 103 used, and the number of animals examined

104

105 While there is one notable example of a CNV having a direct effect on a sheep trait – the agouti  
 106 duplication influencing coat colour [27] - to date, little work has been published on copy number  
 107 variants in the sheep genome. An initial survey assayed eleven sheep on a cattle Roche-NimbleGen  
 108 385K oligonucleotide CGH array (oligo aCGH) which included 385,000 probes that were designed  
 109 based on the cattle genome build btau\_4.0 [28]. That study identified 135 CNV regions (CNVR) that  
 110 covered approximately 0.4% of the sheep genome and ~0.01-0.13% of each individual's genome,  
 111 which is less than the approximately 1% estimated by Pang *et al* [8] in humans. This suggests many  
 112 more sheep CNVs remain to be identified.

113

114 A number of approaches have been used to detect the presence of CNV. The main platforms are  
 115 comparative genomic hybridisation (CGH) arrays [29-33], SNP arrays [34-37] and depth of coverage  
 116 metrics applied to whole genome sequence data (e.g., [38-42]). Further, there are a variety of  
 117 algorithms that can be used to analyse available resultant data. Perhaps the most widely used

platform is array CGH, as it represents a cost-effective method to detect CNVs on a genome-wide scale in multiple individuals [43].

Trios have been used in CNV studies to determine the de novo mutation rate and to identify CNVs that represent heritable genetic units [4, 22, 44, 5]. This involves identifying CNVs in a father-mother-progeny trio. CNVs present in progeny and at least one parent are thought of as heritable and CNVs present in progeny but not in either parent indicate either a de novo mutation or an error in CNV identification. Given that CNVs are difficult to detect regardless of the platform or methods used, the best approach appears to be the conservative use of multiple methods to generate a set of high confidence CNV calls.

The objective of this study was to conduct a survey of sheep CNVRs using a range of detection methods. A Roche-NimbleGen 2.1M CGH array was designed and 36 animals (which included sets of trios) were assayed. Independent detection approaches were used in an attempt to validate the results. Finally, the CNVRs detected in this study were compared to those reported in an earlier survey of the sheep genome [28] and those detected in seven separate cattle studies [19, 20, 25, 28, 21-23].

## Results

### *Roche-NimbleGen 2.1M CGH array construction and application*

A total of four methodologies were used to detect CNV, with the main approach being the development and application of a 2.1M probe CGH array for the sheep genome. In total, 2,012,210 probes were designed with an average spacing across the autosomes of approximately 1.2 Kb. The array was used to assay a total of 36 sheep genomes, consisting of 30 individuals drawn from the International Mapping Flock [45] and a further six from a Reference Panel of International Sheep

Genomics Consortium (ISGC) sheep (Supplementary Table 1). The Roche-NimbleGen segMNT algorithm was used to call CNV segments in each animal compared to the reference animal. A logistic regression model was developed using known positives (trio calls) and known false positives (self-self hybridisation calls) to predict true CNVs in the wider dataset, with some further downstream processing. The total number of autosomal segment calls predicted to represent true CNVs by our model, using CGH data from 30 animals, was 12,802. After removing calls based on a series of quality filters, a total of 9,789 autosomal CNV calls remained (Table 1). The mean absolute  $\log_2$  ratio of these calls was 0.54 and the average length was 30kb with a range in length of 1kb-2.5Mb (Table 1).

On average, 326 CNVs were detected per individual, with a median of 321 and range of 109 to 643. One animal had notably more CNV calls than the other animals, however, it had the same CNV content on the autosomes (as a percentage of total length in base pairs) as the other animals.

# *Autosomal CNVR*

CNV information from all animals was combined to obtain 3,488 CNV regions on the ovine autosomes (Supplementary Table 2). The average length of these CNVRs was 19kb, with a range of 1kb to 3.6Mb. Shorter CNVRs were more frequent than longer CNVRs in the genome. The total length of all CNVRs was 67.6Mbps, which equates to 2.7% of the sheep autosomes. For individuals, this value ranged from 0.24 to 0.55%. Most CNVRs were seen in just one animal (Figure 1), however 1,424 (41%) were independently called in at least 2 individuals. A small percentage (0.11%) of CNVRs were observed in all animals, which likely indicates the presence of a CNV in the reference animal only - the 'reference effect' [46]. The majority of CNVRs (58%) contained only deletion CNVs, 38% of CNVRs contained only duplication CNVs and 4% were compound CNVRs, containing both duplication and deletion CNVs.

The number of CNVRs on each chromosome ranged from 76 on chromosome 27 to 185 on chromosome 19 (Figure 2). As can be seen in Figure 2, there was a weak positive linear relationship between chromosome length and number of CNVRs ( $R^2=0.27$ ).

The average spacing between CNVRs ranged from one every 347kbp on chromosome 19 to one every 1.2Mb on chromosome 1. The closest CNVRs were approximately 1.5kb apart, while the largest distance separating CNVRs was 8.5Mbps. The two-sample Kolmogorov-Smirnov test showed that the distribution of the CNVRs in the genome (in terms of the inter-CNV distance) was significantly different to that which would be expected should the CNVRs be uniformly distributed ( $p\text{-value} = 4.56 \times 10^{-7}$ ). Specifically, the CNVRs tended to be clustered together in the genome (Figure 3).

#### *Cross platform verification of autosomal CNVRs using 385K and SNP50 data*

A small subset of animals assayed with the 2.1M CGH array were also used for data generation with either a lower density 385K CGH array (5 individuals) or the OvineSNP50 BeadChip (24 animals; Supplementary Table 1). This facilitated an examination of the proportion of CNVRs independently called across platforms. Using the 2.1 M CGH array, for the five reference animals a total of 935 CNVRs (1,268 CNV calls) were identified that could be mapped to genome BTA\_OARv.2 for comparison to Roche-NimbleGen 385K CGH array results. Of these, only 13 CNVRs (and 17 CNV calls) had a corresponding segment call in the 385K CGH array dataset (Table 2). The average length of verified CNVR was 387kb, much larger than the average of CNVRs that were not verified using the 385K CGH dataset (30kb). Possible explanations for the very low verification rate (1.4%) are provided in the Discussion, but are likely to be caused in part by the differences in the probe density between the two CGH arrays. This prompted the reverse comparison, whereby 52 CNV segment calls made using the 385K CGH array (with absolute  $\log_2$  ratio threshold of 0.25) were examined within the larger 2.1 M CGH array CNV calls. Only 29% (15) of these calls overlapped CNVRs from the 2.1M CGH array.

192

193 A separate comparison was performed against OvineSNP50 BeadChip data. A total of 2,847 CNVRs  
194 were observed in the 24 animals common to both platforms (2.1M CGH array and OvineSNP50  
195 BeadChip), arising from 7,416 CNVs. Of these, just three CNV calls (two CNVRs) overlapped CNVs  
196 called by cnvPartition (Illumina Inc., USA) analysis of the SNP data (Table 2). CNVs predicted by the  
197 DNACopy software [47] using Illumina Ovine SNP50 BeadChip data verified more CNVRs than  
198 cnvPartition, with 101 CNVs corresponding to 64 CNVRs verified by DNACopy CNV calls (Table 2). The  
199 three calls verified with the cnvPartition dataset were not verified by DNACopy.

200

201 *Cross platform verification of autosomal CNVRs using DNA sequence data and 2.1M CGH array data*  
202 *in sheep*

203 The final comparison utilised analysis of whole genome sequence from the six reference panel  
204 animals. Each individual was sequenced to between 9.8X and 14X genome wide coverage before  
205 variation in read depth was used to detect CNVR (see Methods). The same six animals had 852  
206 CNVRs arising from 1,164 CNV calls detected using the 2.1M CGH array. Comparing the CNV calls  
207 revealed 61% of the Roche-NimbleGen 2.1M CGH array CNV calls were independently identified in  
208 the sequence data (Table 2). Two thirds of the CNV calls that were verified were observed as a  
209 consistent deletion or duplication CNV across platforms in a specific animal. The remaining verified  
210 CNVs were observed as a CNV of the opposite type (deletion versus duplication) in the Poll Dorset  
211 animal. This animal was used as the reference animal on the Roche-NimbleGen 2.1M CGH array and  
212 therefore CNVs in this animal can be incorrectly observed as CNVs in the test animal when in fact no  
213 CNV is present in the test animal. That is, a deletion in the Poll Dorset may be observed as a  
214 duplication in the test animal on the 2.1M CGH array, while in the sequence data, the test animal  
215 shows no CNV in the region but the Poll Dorset shows a deletion. The same is true for duplications in  
216 the Poll Dorset, which will be observed as deletions in the test animal, even if no CNV is present in  
217 the test animal in that region.



There were instances where the sequence data showed that there was a CNV in the Poll Dorset and the test animal in the same region, but the type (duplication/deletion) of CNV in the test animal was not consistent between the 2.1M CGH array and sequence platforms. For example, a 2.1M CGH deletion that was observed as a duplication in the test and reference animal in the sequence data. These calls were considered to be verified as there were still CNVs present in the sequence data and it is possible that the magnitude of the  $\log_2$  ratio of the CNV call on the 2.1M CGH array was higher in the Poll Dorset than the test animal which could result in inconsistencies between the types of CNVs detected. There were instances in the data where a CNV call of one particular CNV region could be verified in one animal and not in another animal, which indicates that the CNV is likely present in both animals but the sequence analysis failed to identify the CNV in one of the animals.

Significant differences in absolute  $\log_2$  ratio, length and GC content were observed between the sequence verified and non-verified 2.1M CGH array calls. Verified calls had higher absolute  $\log_2$  ratios (0.62 versus 0.50) and were longer (46kb versus 9kb) on average than non-verified calls. This suggests that longer calls with higher absolute  $\log_2$  ratios are either more likely to represent true CNVs or are easier to verify than shorter calls with lower absolute  $\log_2$  ratios. Sequence corresponding to non-verified calls showed significantly higher (two-tailed t-test for proportions) GC content on average compared to verified calls – 44.6 versus 43.0%. Both verified and non-verified calls had significantly higher GC content compared to the genome average (42.6%). More duplications (72.4%) than deletions were verified on the sequence platform - 72.4% versus 54.7%. This is not surprising, as there was less variation in the sequence data in regions with low read depth, which reduces the ability to detect differences in copy number in these regions and hence also CNVs relating to deletions.

*Comparison of autosomal CNVRs to those identified in the sheep and cattle literature*

In total, we detected 378 (18%) of the 2,154 CNVRs reported in seven other sheep and cattle studies. Of the 2,154 CNVs detected in the seven other studies, 352 were present in more than one study. We detected 132 (38%) of the 352 CNVs observed in multiple studies, whereas we only detected 14% of the CNVRs observed in just one other study (Table 3). The more frequently a CNVR was observed in the other studies, the more likely we were to detect the CNVR (Table 3). We were able to detect 31% of the CNVRs identified in the initial sheep study by Fontanesi *et al* [28] and between 16-62% of CNVRs detected in the cattle studies.

Eleven percent of the 3,336 CNVRs detected in this study and successfully mapped to the btau\_4.0 genome overlapped CNVRs in these other studies. This is lower than would be expected based on overlap between CNVRs from the other studies with each other, which ranges from 20-77%. By comparison, 28% of the CNVRs from the sheep study by Fontanesi *et al* [28] were observed in at least one of the cattle studies.

#### *Overlap between autosomal CNVRs and genes*

Of the 3,335 CNVRs identified on the Roche-NimbleGen 2.1M CGH array that mapped to OARv3 autosomes, 1,335 (40%) overlapped the coding sequence of one or more genes; 45% of duplication CNVRs, 36% of deletion CNVRs and 59% of deletion/duplication CNVRs overlapped genes. The proportion of duplications overlapping the coding sequence of genes was significantly different (Chi-squared test,  $p < 0.0001$ ) to the proportion of deletions overlapping genes. Based on permutation analysis, these proportions were significantly greater than that which would be expected if the CNVRs were randomly distributed in the genome ( $p=0.01$ ). Both the agouti signalling protein and adenosylhomocysteinase genes were overlapped by one of our CNVRs, which confirms the presence of the agouti duplication reported by Norris and Whan [27] in this dataset, and thus provides a positive control for the CNVR identification methods presented here. It is important to note that the agouti duplication can be present in multiple copies [27], hence the reason that it shows up even upon comparison to another white fleeced sheep.

267

## 268 *Non-autosomal CNVRs*

269 The total number of chromosome X Roche-NimbleGen 2.1M CGH array segment calls predicted to be  
 270 real was 697, however, 308 of these were observed as deletions in males. It is possible some of  
 271 these are real, particularly if they are present in the pseudo-autosomal region, however, this cannot  
 272 be confirmed in our analysis as we do not have a clear pseudo-autosomal boundary defined. After  
 273 filtering all 697 CNV calls based on size and  $\log_2$  ratios, 615 of these were predicted to be real,  
 274 however, only 317 were either deletions or duplications in females or duplications in males. These  
 275 317 were used to call CNVRs on chromosome X. In total, we estimate there are at least 114 CNVRs  
 276 on chromosome X, representing approximately 3.2% of the length of the X chromosome. In addition  
 277 to chromosome X CNVRs, four CNVRs were identified on UMD3\_OA\_chrun, observed in one to ten  
 278 animals. These CNVRs spanned a total length of 19,304bps.

279

280 Including the 3,488 CNVRs observed on the autosomes, we estimate there to be approximately  
 281 3,606 CNVRs in the sheep genome. This includes CNVRs identified on chromosome X and  
 282 UMD3\_OA\_chrun. The total length of these 3,606 CNVRs is estimated to be 72.4Mbps, however, it is  
 283 possible that some of the CNVRs on UMD3\_OA\_chrun may overlap those identified on the  
 284 autosomes and therefore this number may be slightly lower.

285

## 286 **Discussion**

287 The results reported here provide a genome wide view of the frequency of CNV, an important class  
 288 of genomic variant that is currently poorly characterised in the sheep genome. Using a custom built  
 289 Roche-NimbleGen 2.1M CGH array, 9,789 autosomal CNVs were detected in 30 sheep. On average  
 290 these CNVs covered 0.4% of each animal's genome. This is higher than that reported in the initial  
 291 sheep survey where, on average, 0.05% of an individual sheep genome comprised CNVs [28]. The

difference in estimates is not surprising as this study used a CGH array with 2.1 million probes while Fontanesi *et al* [28] used a CGH array with 385,000 probes. Based on probe spacing in the genome and the filters applied to the data, the earlier study detected CNVs greater than 30kb in length, on average, while this study had a resolution of ~4kb on average. As a result, differences in resolution may have resulted in differences in the number of CNVs detected. This is reflected in the datasets, with the average size of CNVs detected by Fontanesi *et al* [28] being 77.6kb (median 55.9kb) and the average size detected in this study being 30.3kb (median 8.7kb). The individual genome CNV composition estimates are similar to, but slightly lower than, estimates reported in humans (e.g., 0.5%, [48]; 0.78%, [7]; and 1.2%, [8]).

The 9,789 autosomal CNVs reported in this study correspond to 3,488 autosomal CNV regions in the 30 animals tested, representing 2.7% of the sheep genome. This is approximately seven times higher than estimated in the initial sheep survey [28], which is to be expected as more animals were assayed in this study. This estimate is similar to the range of estimates in cattle [19, 25, 21, 26, 22, 23, 20] and again similar but slightly lower than estimates in humans (3.7%, [7]; 5%, [48]). Estimates in humans are likely to provide a more accurate estimate of CNV composition in the genome, as studies have involved more individuals and used a wider range of technologies, often employed together. As in the Fontanesi *et al* [28] study, this study suffers from the lack of a complete reference sheep genome. We used a sheep genome that was constructed using a cattle reference genome to design probes for inclusion on the 2.1M CGH array. The genome used, UMD3\_OA, does not include any regions that are present in the sheep genome but that are not present in the cattle genome. This means that sheep CNVs in regions deleted or of low homology in the cattle genome are likely to have been undetected in this study. Future work will benefit from using a sheep reference genome for CNV analysis.

There were also 118 CNVRs identified on chromosome X and chromosome unknown. However, these were lower confidence calls and were not considered in further analyses. Of the 3,488 autosomal CNVRs identified in this study, 59% were observed in just one animal, which is comparable to results in the literature [7, 35, 22, 23, 37]. One and a half times more deletions than duplications were observed. This imbalance is one that is commonly reported in the literature [49, 50, 22] and could be due to ascertainment bias. The ascertainment bias arises because the proportional difference between probe intensity of test and reference animals is greater for copy number losses than gains meaning that deletions are easier to detect than duplications.

The CNVRs detected in this study tended to be clustered together in the genome. This may be an artefact of the segMNT algorithm and our CNVR calling algorithm, which may have failed to collapse multiple CNVRs originating from one CNVR into one region. However, similar distributions have been reported in other studies [5, 51-53] and also for the closely related segmental duplication variant [9]. If this clustering represents the true underlying distribution in the genome, then it may indicate that the clustered CNVRs are the result of increased mutational activity in repetitive regions of the genome which could facilitate mechanisms such as non-allelic homologous recombination [54]. Determining if the CNVRs are a result of one mutational event or multiple mutational events would require detailed analysis of specific regions, probably using deep sequencing.

There are reports in the literature that CNVRs are preferentially located outside of gene regions [51, 55, 56, 37] and that those CNVs that do overlap genes are more likely to be duplications than deletions [7, 57, 37]. The rationale is that deletions are more disruptive to gene function than duplications and therefore are subject to greater selective pressure. In this study, a significant difference was observed in the proportion of duplications overlapping the coding sequence of genes compared to deletions – 0.45 versus 0.36. However, both of these proportions were significantly higher than would be expected if CNVRs were randomly distributed throughout the genome.

Therefore, in this study there is no evidence to suggest that the CNVRs identified in this study are preferentially excluded from genic regions as has been suggested in the literature. Other results reported in the literature have also found an enrichment of CNVs in these regions [30, 53]. Cooper *et al* [53] suggest that CNVs that overlap segmental duplications (SDs) are more likely to be enriched in genic regions, while CNVs that do not overlap SDs are enriched in gene poor regions of the genome. As genes and segmental duplications are GC rich [58] and GC rich regions are more prone to CNV formation, then it is possible that certain types of CNVs are enriched in genic regions. While selection against or for CNVs and CNV formation mechanisms are reasonable explanations for the depletion or enrichment of CNVs in genic regions, it is also possible that differences reported in the literature are due to ascertainment bias introduced by using different methods for CNV detection. Again, this illustrates the difficulties associated with CNV identification.

CNVRs were difficult to verify between CGH arrays and with the OvineSNP50 BeadChip. Partly, this may be due to the fact that the CNVRs identified with the 2.1M CGH array had to be aligned to different genomes for comparison with the 385K CGH array and OvineSNP50 BeadChip. There is also evidence to suggest that SNPs on SNP chips are often biased away from CNV regions [20, 59, 60]. Also, SNPs that were included on the SNP array were identified using an earlier version of the sheep genome (OARv1) than was used to design probes for the 2.1M CGH array. Therefore, there may be fewer repetitive regions included in the OARv1 genome, which would add to the paucity of SNPs in CNV regions. The average spacing of SNP probes in the sheep genome is one probe every 60kb, which makes it difficult to detect small CNVs, even in regions where probes are spaced relatively consistently, let alone in regions that have fewer SNPs. In combination, these factors may explain the low cross platform verification rate observed with the Illumina OvineSNP50 BeadChip.

Whole genome sequencing exhibited the highest cross platform verification rate, with 61% of CNVs verified with this platform. The CNVs that were unable to be verified were shorter and had lower

absolute  $\log_2$  ratios than calls that were able to be verified. Both verified and non-verified CNVs had significantly higher GC content than the genome average, which supports data from the literature reporting that GC-rich regions can be more prone to CNV formation [61, 62]. Non-verified CNVs had significantly higher GC content than verified CNVs. While it is possible that the non-verified CNVs were false negatives in the sequence analysis, it is also possible that they were false positives in the CGH dataset, as false positive CGH calls can be related to regions with high GC content [63, 64]. Future work could involve adjusting CGH intensity data for GC content.

This study detected 18% of the CNVRs reported in seven other sheep and cattle studies [19, 20, 25, 28, 21-23]. Thirty one percent of the CNVRs that were previously detected in an initial survey of CNVs in the sheep genome [28] were detected in this study. We were able to identify all of the CNVRs that were observed in six of the other studies, but only 14% of CNVRs observed in just one other study. In fact, the more studies a CNVR was detected in, the more likely we were able to identify the CNVR in our analysis. This trend was also reported by Kijas *et al* [22]. This suggests that either these CNVRs are less likely to be false positives or they may be more common than the CNVRs detected in just one study or, alternatively, they may be more likely to occur in both sheep and cattle. Common CNVRs will be present in more individuals in the population and therefore are more likely to be observed in the diverse range of animals tested in the different studies.

Although it is possible that a CNV has persisted since the common ancestor of sheep and cattle, it is much more likely that repeated mutations at the same site cause a CNVR to be polymorphic in both species. Microsatellites illustrate a similar phenomenon, with approximately 53% of cattle microsatellite markers observed as polymorphic in sheep [45]. This is unlikely to be due to counterbalancing selection maintaining the same alleles in both species, but instead due to repeated and often recurrent mutations at the microsatellite locus maintaining it as polymorphic. The phenomena depends on the high mutation rate of microsatellites -  $1.1 \times 10^{-4}$  per gamete per locus

[65] relative to the effective population size of the species, so that additional mutations at the locus are created faster than they can be purged by genetic drift and purifying selection. The high reported CNV mutation rates supports this hypothesis [3]. Another reason that some CNV regions are common to both cattle and sheep could be that they are not necessarily CNVRs persistent since the divergence of sheep and cattle, but are CNVs that have formed independently in sheep and cattle individuals in conserved regions that are more predisposed to CNV formation. An example would be a region containing segmental duplications that was present in the common ancestor between sheep and cattle. It is possible that the CNVRs that are shared between sheep and cattle may indicate that these CNVRs provide a selective advantage and are therefore maintained in both sheep and cattle species. Drawing conclusions about this would require analysing the relevant regions of cattle and sheep genomes to investigate the sequence diversity within the CNV alleles in an attempt to estimate their age.

Reasons that this study was unable to detect many of the CNVs from the other studies include: CNVs that occur in cattle but not sheep; rare CNVs not seen in our sample of sheep; and false negatives in our study due in part to the different methods used for CNV detection. Similarly, only a small number (11%) of CNVRs identified in this study overlapped CNVs detected in these seven other studies. Again, lack of overlap could be due to the different species or individual animals tested, different methods used for CNV detection, false negatives in other studies and false positives in our dataset. Confirmation rates varied widely across the studies compared to our results. Variation in confirmation rates from different studies has also been reported in the literature for human CNV studies [66, 67].

## Conclusions



In this study, comprehensive information from trios, multiple platforms and different algorithms were used with the aim of verifying CNV segment calls from the Roche-NimbleGen 2.1M CGH array. CNVs are difficult to verify and as is observed in the literature, a combination of approaches appears to be the best way to accurately detect CNVs on a large scale. It is likely that comprehensive sequencing or qPCR would provide clearer information about individual CNV regions and give an indication of the accuracy of the methods used to detect them. Regardless, characteristics of the CNV regions detected in this study are comparable to those reported in the literature, and the CNV regions identified here add to the initial survey of CNVs in the sheep genome by Fontanesi *et al* [28].

## Methods

### *Roche-NimbleGen 2.1M CGH array - design overview*

In total, 2,012,210 probes (50-75 base pairs in length) were distributed evenly on non-repetitive regions of the UMD3\_OA ovine genome build (an in-house AgResearch comparative sheep genome assembly, built using cattle reference genome UMD3 [68] and accessible at [www.sheephapmap.org/CNV/](http://www.sheephapmap.org/CNV/)), with an average spacing of approximately one probe per 1,250 base pairs (bps) on the autosomes and one probe per 1700bps on chromosome X. In addition to these probes, a further set of probes was designed around SNPs found on the Illumina OvineSNP50 BeadChip, with the aim of increasing cross platform validation between the 2.1M CGH array and OvineSNP50 BeadChip. This involved mapping SNPs and flanking sequence onto UMD3\_OA. In some instances, SNP sequences did not map uniquely to the genome, with multiple hits on the same chromosome, suggesting the possibility that multiple copies of the sequence could occur in adjacent duplicated regions (e.g. CNV). As these SNPs may have been in CNV regions, these regions were also used for specific probe design and inclusion on the array. Probes were also designed on chromosome unknown scaffolds. Chromosome unknown scaffolds represent sequence data that cannot be placed on the genome assembly.

444

445 *Roche-NimbleGen 2.1M CGH array design - targeted probe design around OvineSNP50 BeadChip*

446 *SNPs*

447 In total, 28,754 out of 50,064 SNP sequences (either the 50bp OvineSNP50 BeadChip probe or 300bp  
448 flanking the SNP) successfully mapped to UMD3\_OA (BLAST parameters -U T -F "m D" -e 1e-5, Korf *et*  
449 *al* [69]) and met the requirement of having three probes designed to cover them, as selected by one  
450 of the following two methods (Figure 4). The first involved designing a probe to cover the SNP base  
451 pair position. Flanking probes were designed within 400bp windows 100bp up- or down-stream of  
452 the SNP region, where the SNP region consisted of 300bps flanking the SNP position. If three probes  
453 were not obtained with this method, then a second method was used. This involved selecting a  
454 probe in the SNP region without requiring the probe to cover the SNP position, with flanking probes  
455 selected from 400bp windows 100bp up- or down-stream of the SNP region (Figure 4). In total,  
456 86,262 probes were designed within or adjacent to 28,754 SNP regions.

457 Of the 21,310 SNP sequences that could not be mapped to UMD3\_OA, 240 were mapped by relaxing  
458 the BLAST parameters to -W 11 -q -1 -r 1 -s 0 -F "m D" -U T -X 40 [69]. A total of 634 probes were  
459 designed to cover 218 of these SNP regions.

460 A subset of 401 SNP sequences mapped to UMD3\_OA, but not uniquely - with two top hits on the  
461 same chromosome. In total, 879 probes covering 323 of these positions were designed for inclusion  
462 on the 2.1M CGH array.

463

464 *Roche-NimbleGen 2.1M CGH array design – chromosome unknown*

465 Chromosome unknown sequences (n=492) were merged into a virtual chromosome,  
466 UMD3\_chrU\_OA, with each sequence separated by 100 N's. Probes were distributed at an average  
467 spacing of approximately one every 1,600bps on this chromosome.

468

469 *Roche-NimbleGen 2.1M CGH array – animals assayed*

470 Genomic DNA was extracted from blood samples of 36 animals (Supplementary Table 1), which were  
 471 assayed on the 2.1M CGH array. Thirty animals were from the International Mapping Flock (IMF)  
 472 and consisted of families of trios (Figure 5). The IMF animals are crossbreds of up to five different  
 473 breeds – Texel, Coopworth, Perendale, Romney and Merino [45]. In addition to the IMF animals, six  
 474 sheep, sequenced to approximately 10X coverage each, were also assayed on the 2.1M CGH array.  
 475 These six animals were - Awassi, Merino, Poll Dorset, Romney, Scottish Blackface and Texel  
 476 purebreds. The Poll Dorset was used as the reference animal for all 2.1M CGH array hybridisations  
 477 and was also run against itself in a self-self hybridisation to allow characterisation of false positive  
 478 calls [70, 23].

479

480 *Roche-NimbleGen 2.1M CGH array – segMNT output processing*

481 CNV segments were called in the assayed animals by Roche-NimbleGen using their proprietary  
 482 segMNT algorithm. This software reports the average  $\log_2$  ratio of a segment (the binary logarithm of  
 483 the average of the intensity of the test animals probes in a segment call divided by the average of  
 484 the intensity of the reference animals probes in the same region), the number of datapoints (probes)  
 485 included in the segment and the length of the segment in base pairs.

486 The variance of normalised  $\log_2$  ratio values over all probes for each animal was obtained. Five  
 487 animals were deleted from the analysis as their  $\log_2$  ratio data exhibited larger variation than  
 488 observed in other animals, meaning that they were deemed to be failed CGH hybridisations.

489 Segment calls with absolute  $\log_2$  ratios less than 0.1 were removed from the analysis [7].

490

491 *Validating Roche-NimbleGen 2.1M CGH array segment calls*

IMF trios were used to validate segment calls. If a progeny segment call was seen in at least one parent at an identical genomic location (same first and last probe included in the segment call and therefore same genomic start and stop position), the progeny call was considered validated. These calls were deemed to represent “true CNVs” for model building.

#### *Model used to predict CNVs in the wider dataset and downstream filtering*

For model building, validated progeny calls were deemed to represent true CNVs and self-self hybridisations were deemed to be false positives. Only autosomal segment calls were used. Forward stepwise logistic regression was used to construct a model, with a binary outcome variable 0 (self-self) or 1 (validated trio segment call). Variables used for model building were: absolute  $\log_2$  ratio (absl2r); whether the call was a deletion or duplication; length, in bps;  $\ln(\text{length})$ ;  $\ln(\ln(\text{length}))$ ; length-squared; number of probes in segment call, datapoints;  $\ln(\text{datapoints})$ ;  $\ln(\ln(\text{datapoints}))$ ; datapoints-squared; and corresponding two- and three-way interactions. If the Wald chi-square statistic for a variable was significant at the 0.3 level it was added to the model. A variable remained in the model if it was significant at the 0.35 level.

The crossvalidate procedure in SAS software (SAS version 9.1) was used to test model performance. This procedure omits one segment call in turn and re-calculates model coefficients based on all other segment calls per iteration. It then predicts the probability the omitted call represents a true CNV. Threshold values were applied to categorise calls as true or false based on their probabilities – true or false. Probability thresholds tested were 0.5, 0.6, 0.7, 0.8, 0.9, 0.95, 0.96, 0.97, 0.98 and 0.99. For each probability threshold tested, the number of times the procedure correctly predicted the known segment call status (true or false) was used as a measure of model accuracy. The final probability threshold used was 0.95.

The final model selected was,

$$\ln\left(\frac{p}{(1-p)}\right) = -0.19 + 29.51absl2r - 4.91(\ln(\ln(length))) + 8.24(\ln(\ln(datapoints)))$$

517 This model was applied to all segment calls not used in model development. Segment calls equal to  
518 or greater than the probability threshold of 0.95 were retained. The dataset was further filtered to  
519 include only CNVs >=1kbp in length (so that they conformed to the definition of a CNV, as per [2],  
520 only CNVs with >= 3 probes in the corresponding segment call and with absolute log<sub>2</sub> ratio >=0.25.  
521 These filtered segment calls were deemed to represent true CNVs.  
522  
523 Segment calls on chromosome X were processed through the model and filtered as above. Filtered  
524 CNVs on chromosome X were considered to represent true CNVs for female individuals. Duplications  
525 on chromosome X in males were considered to represent true CNVs. Deletions on chromosome X in  
526 males were assumed to be inconclusive as they could be due to differences in the number of X  
527 chromosomes between the male test animal and the female reference animal.  
528  
529 Segment calls on the virtual chromosome UMD3\_chrU\_OA were processed differently to segment  
530 calls on the autosomes and chromosome X. Chromosome unknown sequences were collated into  
531 larger virtual chromosomes, UMD3\_chrU\_OA, with each sequence separated by 100 N's. Segment  
532 calls on this virtual chromosome were discarded if they spanned more than one chromosome  
533 unknown sequence or if all probes on one chromosome unknown sequence were included in the  
534 segment call. The reason for excluding segment calls where all probes on the chromosome unknown  
535 sequence were included in the call was because there was no way to compare the call to nearby  
536 sequence to determine if the log<sub>2</sub> ratio was different to other stretches of DNA in the region. There  
537 were two Poll Dorset (self-self hybridisation) segment calls on UMD3\_chrU\_OA. The log<sub>2</sub> ratios of  
538 these calls were -0.32 and -0.17. Thus calls with absolute log<sub>2</sub> ratios ≤0.32 were removed from the  
539 analysis. Segment calls that met these criteria and that contained at least two probes, while  
540 excluding at least two probes from the corresponding chromosome unknown sequence, were  
541 retained.

542

# 543 *CNV regions*

544 Across all animals, autosomal and chromosome X CNVs within 1,500bps of one another were  
545 collapsed into CNV regions (CNVRs).

546

547 To determine if CNVRs were uniformly distributed in the genome, a simulated dataset of CNVRs was  
548 generated by randomly sampling genomic positions of the identified autosomal CNVRs from a  
549 uniform distribution. Spacing was constrained so that CNVRs could not be within 1,500bps of each  
550 other. The simulated dataset provided an expected distribution of CNVRs in the genome and  
551 corresponding pairwise distances between CNVRs. A Kolmogorov-Smirnov test was performed to  
552 determine if the distribution of pairwise distances between CNVRs in the observed dataset was  
553 significantly different from that seen in the simulated dataset.

554

# 555 *Verifying CNVRs across platforms*

556 Three other platforms were used for CNV identification – Roche-NimbleGen 385K CGH array,  
557 OvineSNP50 BeadChip, and Illumina HiSeq 2000 sequence data analysis, with each based on a  
558 different version of the ovine genome. To perform cross platform validation autosomal CNVRs  
559 identified on the Roche-NimbleGen 2.1M CGH array were mapped to genomes BTA\_OARv.2 (for use  
560 with the 385K CGH array), OARv1 (for use with the OvineSNP50 BeadChip) and OARv3 (for use with  
561 sequence data analysis). CNVR sequence and 1,750bps flanking the start and stop of each CNVR  
562 were obtained. Sequences were masked with an ovine repeat database isgcandrepbase2  
563 (Supplementary file 1) and BLASTed against each genome, with parameters -F 'm D' -U T -Z 2000  
564 [69]. CNVR start and stop positions on each genome were approximated based on the BLAST

alignment. When the predicted CNVR start position was a negative number, it was set to one (i.e. the first base pair of the chromosome).

The Roche-NimbleGen 385K CGH array is based on the same technology as the Roche-NimbleGen 2.1M CGH array; however, it has fewer probes covering the genome, with a probe density of approximately 1 probe per 6,000bps. Twenty animals were run on the 385K CGH array, including five animals (Awassi, Merino, Romney, Scottish blackface and Texel) that were run on the 2.1M CGH array. The Poll Dorset was used as a reference on the 385K CGH array and the 2.1M CGH array. Autosomal CNVRs identified using the 2.1M CGH array were positioned on BTA\_OARv.2 as described above. CNVRs positioned on BTA\_OARv.2 autosomes were retained for cross platform verification. CNV segments called by the NimbleGen segMNT software in the 385K CGH dataset were processed to include only autosomal segments with absolute  $\log_2$  ratios  $\geq 0.25$ . Autosomal CNVRs in the five animals were considered verified if there was overlap between their processed 385K CGH segment calls and their 2.1M CGH array CNVR calls mapped to BTA\_OARv.2. This comparison was performed separately for each animal.

Twenty IMF and five sequenced animals had previously been genotyped on the OvineSNP50 BeadChip. SNP genotypes for these animals were run through the cnvPartition (Illumina Inc., USA) and DNACopy [47] algorithms. DNACopy results were filtered to include only calls with absolute  $\log_2$  ratios  $\geq 0.25$ . Autosomal CNVRs identified with the 2.1M CGH array and successfully mapped to OARv1 autosomes were considered verified if they overlapped autosomal CNVs predicted by cnvPartition or DNACopy, in the same animal.

Six animals assayed on the 2.1M CGH array were each sequenced to between 9.8X and 14X coverage by paired-end sequencing on the Illumina HiSeq 2000 platform at Baylor College of Medicine. The

following analysis was carried out separately for each animal. Sequence reads were positioned on ovine genome OARv3 using the Burrows-Wheeler Alignment (BWA) algorithm [71] and pileup files [72] were used to retrieve read depth information at each base pair position on the autosomes. Reads were portioned into 1kbp overlapping bins, excluding repetitive sequence, using a sliding window of 200bps. Masked repetitive sequence positions were translated to genome build OARv3. As well as excluding repetitive sequence, for each chromosome a maximum read depth was set per chromosome to exclude potentially unmasked repeats from the CNV sequence analysis. The maximum read depth threshold was set based on inspection of the read depth distribution function with the aim of excluding outliers in read depth data. Bins with a maximum read depth exceeding the threshold were deleted from the analysis. The average read depth over all base pairs was determined for each bin after correcting for GC content based on methods presented by Yoon *et al* [73].

Pseudo-Maximum likelihood was used to fit a mixture model to determine if the average read depth for each bin represented a homozygous deletion (copy number, CN=0), heterozygous deletion (CN=1), normal diploid copy number (2), heterozygous duplication (3) or homozygous duplication (4) in the genome. The mixture model used (Table 4) was a mixture of four normal distributions (for modeling CN = 1 to 4) and one half-normal distribution (for CN = 0). Constraints were placed on the parameters of the normal distributions so that the means and variances of the distributions corresponding to CN =1, 3 and 4 were equal to respectively 1/2, 3/2 and 2 times the mean and variance of the distribution corresponding to CN = 2. Model fitting was done on a per chromosome basis, using the R function *nlfminb* [74]. Specifically, seven parameters were estimated for each chromosome:  $\mu_2$  and  $\sigma_2^2$ , the mean and variance of read depth for a bin corresponding to CN = 2 (the “normal” diploid copy number);  $\sigma_0^2$ , the variance of read depth for a bin corresponding to CN = 0 (homozygous deletion) and four of the five mixture weights (prior probability of a bin falling into each of the five distributions). Where these parameters could not be estimated for a chromosome,



average estimates based on all other chromosomes for a given animal were used. Table 5 details the starting values and lower and upper bounds used by *nlimb* for each parameter. Based on those parameter estimates, each bin was assigned to one of the five CNV classes by multiplying the values of each of the five probability density functions for each bin by the corresponding mixture weights (i.e., calculating the posterior probability of a bin being in each of the distributions) and selecting the CNV class with the highest value. For each of the six animals, bins in regions corresponding to autosomal CNVRs identified on the 2.1M CGH array and mapped to OARv3 autosomes were used to determine if the CNVR was verified in the sequence data. In instances where there was conflict between results from the sequence analysis and the 2.1M CGH array, individual animal data were compared to the reference (Poll Dorset) animal. This animal was used as the reference animal in the 2.1M CGH array experiments and therefore results for individual animals may be influenced by the corresponding copy number present in the Poll Dorset.

#### *Comparison of CNVRs to those identified in the literature*

CNVR sequences were masked against AgResearch ovine repeat database isgcandrebase2 and BLASTed against btau\_4.0 using BLAST parameters -F 'm D' -U T -Z 2000 [69] to obtain their positions on the genome. Genomic positions on btau\_4.0 of CNVs identified from seven other sheep and cattle studies [28, 21-23, 25, 19, 20] were obtained. An overlap of 1bp or more between autosomal CNVRs identified in this study and these seven other studies was used to give an indication as to how many CNVs from other studies we were able to detect and how many of the CNVs detected in this study were also reported in the other studies.

#### *Overlap between autosomal CNVRs and genes*

CNVR sequences were masked (isgcandrebase2) and BLASTed (parameters -F 'm D' -U T -Z 2000) against OARv3 to obtain their positions on the genome. Positions of the coding sequence of genes on OARv3 were provided by BGI (personal communication, Rudiger Brauning). Overlap between autosomal CNVRs and the coding sequence of genes were determined. CNVRs that overlapped gene

coding sequences by 1bp or more were used to derive the proportion of CNVRs overlapping genes. Overlap with the agouti signalling protein and adenosylhomocysteinase genes were used as a positive control, as this locus is observed as duplicated in the sheep genome [27].

A Monte Carlo simulation was set up to randomly distribute the CNVRs throughout the sheep genome and to create a distribution of the expected proportion of deletion CNVRs and duplication CNVRs overlapping genes (by at least 1bp). One hundred iterations were run to generate 100 expected proportions for both duplications and deletions. For both duplication and deletion CNVRs, the observed proportion was ranked along with the 100 simulated proportions and a two-tailed empirical p-value was calculated.

## **Competing interests**

The authors declare that they have no competing interests.

## **Authors' contributions**

GMJ carried out the research and wrote the manuscript. MEG, MAB and JCM participated in study design, provided input on analysis and revised the manuscript. JWK provided access to data and revised the manuscript. KGD consulted on statistical analysis. BA was involved in sequence analysis. RB carried out and advised on bioinformatic processes and was involved in the design of the Roche NimbleGen 2.1M CGH array. NC revised the manuscript. All authors read and approved the final manuscript.

## Acknowledgments

The authors wish to acknowledge the financial contribution made by Ovita Limited and USDA grant AFRI 2009-03305 for providing funding for a large part of this work. The authors also wish to acknowledge James Kijas for providing access to International Sheep Genomics Consortium sheep samples, whole genome sequence from these samples and early access to genome assemblies.

## References

1. Stranger BE, Forrest MS, Dunning M, Ingle CE, Beazley C, Thorne N et al. Relative impact of nucleotide and copy number variation on gene expression phenotypes. *Science*. 2007;315(5813):848-53. doi:315/5813/848 [pii]
- 10.1126/science.1136678.
2. Feuk L, Carson AR, Scherer SW. Structural variation in the human genome. *Nat Rev Genet*. 2006;7(2):85-97. doi:[http://www.nature.com/nrg/journal/v7/n2/supinfo/nrg1767\\_S1.html](http://www.nature.com/nrg/journal/v7/n2/supinfo/nrg1767_S1.html).
3. Egan CM, Sridhar S, Wigler M, Hall IM. Recurrent DNA copy number variation in the laboratory mouse. *Nat Genet*. 2007;39(11):1384-9. doi:10.1038/ng.2007.19.
4. Abecasis GR, Altshuler D, Auton A, Brooks LD, Durbin RM, Gibbs RA et al. A map of human genome variation from population-scale sequencing. *Nature*. 2010;467(7319):1061-73. doi:nature09534 [pii]
- 10.1038/nature09534.
5. Michaelson Jacob J, Shi Y, Gujral M, Zheng H, Malhotra D, Jin X et al. Whole-Genome Sequencing in Autism Identifies Hot Spots for De Novo Germline Mutation. *Cell*. 2012;151(7):1431-42. doi:<http://dx.doi.org/10.1016/j.cell.2012.11.019>.
6. Stankiewicz P, Lupski JR. Structural variation in the human genome and its role in disease. *Annu Rev Med*. 2010;61:437-55. doi:10.1146/annurev-med-100708-204735.
7. Conrad DF, Pinto D, Redon R, Feuk L, Gokcumen O, Zhang Y et al. Origins and functional impact of copy number variation in the human genome. *Nature*. 2010;464(7289):704-12. doi:[http://www.nature.com/nature/journal/v464/n7289/supinfo/nature08516\\_S1.html](http://www.nature.com/nature/journal/v464/n7289/supinfo/nature08516_S1.html).
8. Pang A, MacDonald J, Pinto D, Wei J, Rafiq M, Conrad D et al. Towards a comprehensive structural variation map of an individual human genome. *Genome Biology*. 2010;11(5):R52.
9. Kim PM, Lam HYK, Urban AE, Korbel JO, Affourtit J, Grubert F et al. Analysis of copy number variants and segmental duplications in the human genome: Evidence for a change in the process of formation in recent evolutionary history. *Genome Res*. 2008;18(12):1865-74. doi:10.1101/gr.081422.108.
10. Long J, Delahanty RJ, Li G, Gao YT, Lu W, Cai Q et al. A Common Deletion in the APOBEC3 Genes and Breast Cancer Risk. *J Natl Cancer Inst*. 2013;105(8):573-9. doi:djt018 [pii]
- 10.1093/jnci/djt018.
11. Yang L, Liu B, Huang B, Deng J, Li H, Yu B et al. A functional copy number variation in the WWOX gene is associated with lung cancer risk in Chinese. *Hum Mol Genet*. 2013;22(9):1886-94. doi:ddt019 [pii]
- 10.1093/hmg/ddt019.

703 12. Suehiro Y, Okada T, Shikamoto N, Zhan Y, Sakai K, Okayama N et al. Germline copy number  
704 variations associated with breast cancer susceptibility in a Japanese population. *Tumour Biol.*  
705 2012;34(2):947-52. doi:10.1007/s13277-012-0630-x.  
706 13. Fanciulli M, Norsworthy PJ, Petretto E, Dong R, Harper L, Kamesh L et al. FCGR3B copy number  
707 variation is associated with susceptibility to systemic, but not organ-specific, autoimmunity. *Nat*  
708 *Genet.* 2007;39(6):721-3. doi:ng2046 [pii]  
709 10.1038/ng2046.  
710 14. Gonzalez E, Kulkarni H, Bolivar H, Mangano A, Sanchez R, Catano G et al. The influence of CCL3L1  
711 gene-containing segmental duplications on HIV-1/AIDS susceptibility. *Science.* 2005;307(5714):1434-  
712 40. doi:1101160 [pii]  
713 10.1126/science.1101160.  
714 15. Salmon Hillbertz NH, Isaksson M, Karlsson EK, Hellmen E, Pielberg GR, Savolainen P et al.  
715 Duplication of FGF3, FGF4, FGF19 and ORAOV1 causes hair ridge and predisposition to dermoid sinus  
716 in Ridgeback dogs. *Nat Genet.* 2007;39(11):1318-20. doi:ng.2007.4 [pii]  
717 10.1038/ng.2007.4.  
718 16. Wright D, Boije H, Meadows JR, Bed'hom B, Gourichon D, Vieaud A et al. Copy number variation  
719 in intron 1 of SOX5 causes the Pea-comb phenotype in chickens. *PLoS Genet.* 2009;5(6):e1000512.  
720 doi:10.1371/journal.pgen.1000512.  
721 17. Chen C, Qiao R, Wei R, Guo Y, Ai H, Ma J et al. A comprehensive survey of copy number variation  
722 in 18 diverse pig populations and identification of candidate copy number variable genes associated  
723 with complex traits. *BMC Genomics.* 2012;13:733. doi:1471-2164-13-733 [pii]  
724 10.1186/1471-2164-13-733.  
725 18. Johansson Moller M, Chaudhary R, Hellmen E, Hoyheim B, Chowdhary B, Andersson L. Pigs with  
726 the dominant white coat color phenotype carry a duplication of the KIT gene encoding the  
727 mast/stem cell growth factor receptor. *Mamm Genome.* 1996;7(11):822-30.  
728 19. Bae J, Cheong H, Kim L, NamGung S, Park T, Chun J-Y et al. Identification of copy number  
729 variations and common deletion polymorphisms in cattle. *BMC Genomics.* 2010;11(1):232.  
730 20. Bickhart DM, Hou Y, Schroeder SG, Alkan C, Cardone MF, Matukumalli LK et al. Copy number  
731 variation of individual cattle genomes using next-generation sequencing. *Genome Res.*  
732 2012;22(4):778-90. doi:10.1101/gr.133967.111.  
733 21. Hou Y, Liu GE, Bickhart DM, Cardone MF, Wang K, Kim ES et al. Genomic characteristics of cattle  
734 copy number variations. *BMC Genomics.* 2011;12:127. doi:1471-2164-12-127 [pii]  
735 10.1186/1471-2164-12-127.  
736 22. Kijas JW, Barendse W, Barris W, Harrison B, McCulloch R, McWilliam S et al. Analysis of copy  
737 number variants in the cattle genome. *Gene.* 2011;482(1-2):73-7. doi:S0378-1119(11)00179-X [pii]  
738 10.1016/j.gene.2011.04.011.  
739 23. Liu GE, Hou Y, Zhu B, Cardone MF, Jiang L, Cellamare A et al. Analysis of copy number variations  
740 among diverse cattle breeds. *Genome Res.* 2010;20(5):693-703. doi:10.1101/gr.105403.110.  
741 24. Cicconardi F, Chillemi G, Tramontano A, Marchitelli C, Valentini A, Ajmone-Marsan P et al.  
742 Massive screening of copy number population-scale variation in *Bos taurus* genome. *BMC Genomics.*  
743 2013;14(1):124. doi:1471-2164-14-124 [pii]  
744 10.1186/1471-2164-14-124.  
745 25. Fadista J, Thomsen B, Holm LE, Bendixen C. Copy number variation in the bovine genome. *BMC*  
746 *Genomics.* 2010;11:284. doi:1471-2164-11-284 [pii]  
747 10.1186/1471-2164-11-284.

748 26. Jiang L, Jiang J, Yang J, Liu X, Wang J, Wang H et al. Genome-wide detection of copy number  
749 variations using high-density SNP genotyping platforms in Holsteins. *BMC Genomics*. 2013;14(1):131.  
750 doi:1471-2164-14-131 [pii]  
751 10.1186/1471-2164-14-131.  
752 27. Norris BJ, Whan VA. A gene duplication affecting expression of the ovine ASIP gene is responsible  
753 for white and black sheep. *Genome Res*. 2008;18(8):1282-93. doi:gr.072090.107 [pii]  
754 10.1101/gr.072090.107.  
755 28. Fontanesi L, Beretti F, Martelli PL, Colombo M, Dall'Olio S, Occidente M et al. A first comparative  
756 map of copy number variations in the sheep genome. *Genomics*. 2011;97(3):158-65.  
757 doi:10.1016/j.ygeno.2010.11.005.  
758 29. Barrett MT, Scheffer A, Ben-Dor A, Sampas N, Lipson D, Kincaid R et al. Comparative genomic  
759 hybridization using oligonucleotide microarrays and total genomic DNA. *Proc Natl Acad Sci U S A*.  
760 2004;101(51):17765-70. doi:0407979101 [pii]  
761 10.1073/pnas.0407979101.  
762 30. Graubert TA, Cahan P, Edwin D, Selzer RR, Richmond TA, Eis PS et al. A high-resolution map of  
763 segmental DNA copy number variation in the mouse genome. *PLoS Genet*. 2007;3(1):e3. doi:06-  
764 PLGE-RA-0282R3 [pii]  
765 10.1371/journal.pgen.0030003.  
766 31. Kallioniemi A, Kallioniemi OP, Sudar D, Rutovitz D, Gray JW, Waldman F et al. Comparative  
767 genomic hybridization for molecular cytogenetic analysis of solid tumors. *Science*.  
768 1992;258(5083):818-21.  
769 32. Pinkel D, Segraves R, Sudar D, Clark S, Poole I, Kowbel D et al. High resolution analysis of DNA  
770 copy number variation using comparative genomic hybridization to microarrays. *Nat Genet*.  
771 1998;20(2):207-11.  
772 33. Yu H, Chao J, Patek D, Mujumdar R, Mujumdar S, Waggoner AS. Cyanine dye dUTP analogs for  
773 enzymatic labeling of DNA probes. *Nucleic Acids Res*. 1994;22(15):3226-32.  
774 34. Jeon JP, Shim SM, Jung JS, Nam HY, Lee HJ, Oh BS et al. A comprehensive profile of DNA copy  
775 number variations in a Korean population: identification of copy number invariant regions among  
776 Koreans. *Exp Mol Med*. 2009;41(9):618-28. doi:10.3858/emm.2009.41.9.068.  
777 35. Kidd JM, Cooper GM, Donahue WF, Hayden HS, Sampas N, Graves T et al. Mapping and  
778 sequencing of structural variation from eight human genomes. *Nature*. 2008;453(7191):56-64.  
779 doi:[http://www.nature.com/nature/journal/v453/n7191/supinfo/nature06862\\_S1.html](http://www.nature.com/nature/journal/v453/n7191/supinfo/nature06862_S1.html).  
780 36. McCarroll SA, Hadnott TN, Perry GH, Sabeti PC, Zody MC, Barrett JC et al. Common deletion  
781 polymorphisms in the human genome. *Nat Genet*. 2006;38(1):86-92.  
782 37. Redon R, Ishikawa S, Fitch KR, Feuk L, Perry GH, Andrews TD et al. Global variation in copy  
783 number in the human genome. *Nature*. 2006;444(7118):444-54.  
784 doi:[http://www.nature.com/nature/journal/v444/n7118/supinfo/nature05329\\_S1.html](http://www.nature.com/nature/journal/v444/n7118/supinfo/nature05329_S1.html).  
785 38. Abyzov A, Urban AE, Snyder M, Gerstein M. CNVnator: an approach to discover, genotype, and  
786 characterize typical and atypical CNVs from family and population genome sequencing. *Genome Res*.  
787 2011;21(6):974-84. doi:gr.114876.110 [pii]  
788 10.1101/gr.114876.110.  
789 39. Teo SM, Pawitan Y, Ku CS, Chia KS, Salim A. Statistical challenges associated with detecting copy  
790 number variations with next-generation sequencing. *Bioinformatics*. 2012;28(21):2711-8.  
791 doi:10.1093/bioinformatics/bts535.  
792 40. Xi R, Hadjipanayis AG, Luquette LJ, Kim TM, Lee E, Zhang J et al. Copy number variation detection  
793 in whole-genome sequencing data using the Bayesian information criterion. *Proc Natl Acad Sci U S A*.  
794 2011;108(46):E1128-36. doi:1110574108 [pii]  
795 10.1073/pnas.1110574108.

796 41. Xi R, Lee S, Park PJ. A survey of copy-number variation detection tools based on high-throughput  
797 sequencing data. *Curr Protoc Hum Genet.* 2012;Chapter 7:Unit7 19.  
798 doi:10.1002/0471142905.hg0719s75.  
799 42. Ye K, Schulz MH, Long Q, Apweiler R, Ning Z. Pindel: a pattern growth approach to detect break  
800 points of large deletions and medium sized insertions from paired-end short reads. *Bioinformatics.*  
801 2009;25(21):2865-71. doi:btp394 [pii]  
802 10.1093/bioinformatics/btp394.  
803 43. Savarese M, Piluso G, Orteschi D, Di Fruscio G, Dionisi M, Blanco FdV et al. Enhancer Chip:  
804 Detecting Human Copy Number Variations in Regulatory Elements. *PLoS ONE.* 2012;7(12):e52264.  
805 doi:10.1371/journal.pone.0052264.  
806 44. Krumm N, Sudmant PH, Ko A, O'Roak BJ, Malig M, Coe BP et al. Copy number variation detection  
807 and genotyping from exome sequence data. *Genome Res.* 2012;22(8):1525-32.  
808 doi:10.1101/gr.138115.112.  
809 45. Crawford AM, Dodds KG, Ede AJ, Pierson CA, Montgomery GW, Garmonsway HG et al. An  
810 autosomal genetic linkage map of the sheep genome. *Genetics.* 1995;140(2):703-24.  
811 46. Freeman JL, Perry GH, Feuk L, Redon R, McCarroll SA, Altshuler DM et al. Copy number variation:  
812 new insights in genome diversity. *Genome Res.* 2006;16(8):949-61. doi:gr.3677206 [pii]  
813 10.1101/gr.3677206.  
814 47. Olshen AB, Venkatraman ES, Lucito R, Wigler M. Circular binary segmentation for the analysis of  
815 array-based DNA copy number data. *Biostatistics.* 2004;5(4):557-72.  
816 doi:10.1093/biostatistics/kxh008.  
817 48. McCarroll SA, Kuruvilla FG, Korn JM, Cawley S, Nemesh J, Wysoker A et al. Integrated detection  
818 and population-genetic analysis of SNPs and copy number variation. *Nat Genet.* 2008;40(10):1166-  
819 74. doi:ng.238 [pii]  
820 10.1038/ng.238.  
821 49. Craddock N, Hurles ME, Cardin N, Pearson RD, Plagnol V, Robson S et al. Genome-wide  
822 association study of CNVs in 16,000 cases of eight common diseases and 3,000 shared controls.  
823 *Nature.* 2010;464(7289):713-20. doi:nature08979 [pii]  
824 10.1038/nature08979.  
825 50. Li Y, Mei S, Zhang X, Peng X, Liu G, Tao H et al. Identification of genome-wide copy number  
826 variations among diverse pig breeds by array CGH. *BMC Genomics.* 2012;13:725. doi:1471-2164-13-  
827 725 [pii]  
828 10.1186/1471-2164-13-725.  
829 51. Berglund J, Nevalainen E, Molin A-M, Perloski M, Consortium TL, Andre C et al. Novel origins of  
830 copy number variation in the dog genome. *Genome Biology.* 2012;13(8):R73.  
831 52. She X, Cheng Z, Zollner S, Church DM, Eichler EE. Mouse segmental duplication and copy number  
832 variation. *Nat Genet.* 2008;40(7):909-14.  
833 doi:[http://www.nature.com/ng/journal/v40/n7/supinfo/ng.172\\_S1.html](http://www.nature.com/ng/journal/v40/n7/supinfo/ng.172_S1.html).  
834 53. Cooper GM, Nickerson DA, Eichler EE. Mutational and selective effects on copy-number variants  
835 in the human genome. *Nat Genet.* 2007;39(7 Suppl):S22-9. doi:ng2054 [pii]  
836 10.1038/ng2054.  
837 54. Stankiewicz P, Lupski JR. Genome architecture, rearrangements and genomic disorders. *Trends*  
838 *Genet.* 2002;18(2):74-82. doi:S0168-9525(02)02592-1 [pii].  
839 55. Zhang F, Gu W, Hurles ME, Lupski JR. Copy number variation in human health, disease, and  
840 evolution. *Annu Rev Genomics Hum Genet.* 2009;10:451-81.  
841 doi:10.1146/annurev.genom.9.081307.164217.  
842 56. Conrad DF, Andrews TD, Carter NP, Hurles ME, Pritchard JK. A high-resolution survey of deletion  
843 polymorphism in the human genome. *Nat Genet.* 2006;38(1):75-81. doi:ng1697 [pii]

10.1038/ng1697.

57. Emerson JJ, Cardoso-Moreira M, Borevitz JO, Long M. Natural Selection Shapes Genome-Wide Patterns of Copy-Number Polymorphism in *Drosophila melanogaster*. *Science*. 2008;320(5883):1629-31. doi:10.1126/science.1158078.

58. Jurka J, Kohany O, Pavlicek A, Kapitonov VV, Jurka MV. Duplication, coclustering, and selection of human Alu retrotransposons. *Proceedings of the National Academy of Sciences of the United States of America*. 2004;101(5):1268-72. doi:10.1073/pnas.0308084100.

59. Cooper GM, Zerr T, Kidd JM, Eichler EE, Nickerson DA. Systematic assessment of copy number variant detection via genome-wide SNP genotyping. *Nat Genet*. 2008;40(10):1199-203. doi:ng.236 [pii]

10.1038/ng.236.

60. Locke DP, Sharp AJ, McCarroll SA, McGrath SD, Newman TL, Cheng Z et al. Linkage disequilibrium and heritability of copy-number polymorphisms within duplicated regions of the human genome. *Am J Hum Genet*. 2006;79(2):275-90. doi:S0002-9297(07)63135-8 [pii]

10.1086/505653.

61. Cooper DN, Bacolla A, Férec C, Vasquez KM, Kehrer-Sawatzki H, Chen J-M. On the sequence-directed nature of human gene mutation: The role of genomic architecture and the local DNA sequence environment in mediating gene mutations underlying human inherited disease. *Hum Mutat*. 2011;32(10):1075-99. doi:10.1002/humu.21557.

62. Nguyen DQ, Webber C, Hehir-Kwa J, Pfundt R, Veltman J, Ponting CP. Reduced purifying selection prevails over positive selection in human copy number variant evolution. *Genome Res*. 2008;18(11):1711-23. doi:gr.077289.108 [pii]

10.1101/gr.077289.108.

63. Liu G, Hou Y, Robl J, Kuroiwa Y, Wang Z. Assessment of genome integrity with array CGH in cattle transgenic cell lines produced by homologous recombination and somatic cell cloning. *Genome Integrity*. 2011;2(1):6.

64. Marioni J, Thorne N, Valsesia A, Fitzgerald T, Redon R, Fiegler H et al. Breaking the waves: improved detection of copy number variation from microarray-based comparative genomic hybridization. *Genome Biology*. 2007;8(10):R228.

65. Crawford AM, Cuthbertson RP. Mutations in sheep microsatellites. *Genome Res*. 1996;6(9):876-9.

66. Winchester L, Yau C, Ragoussis J. Comparing CNV detection methods for SNP arrays. *Brief Funct Genomic Proteomic*. 2009;8(5):353-66. doi:elp017 [pii]

10.1093/bfpg/elp017.

67. Pinto D, Darvishi K, Shi X, Rajan D, Rigler D, Fitzgerald T et al. Comprehensive assessment of array-based platforms and calling algorithms for detection of copy number variants. *Nat Biotech*. 2011;29(6):512-20. doi:<http://www.nature.com/nbt/journal/v29/n6/abs/nbt.1852.html#supplementary-information>.

68. Jenkins G. UMD3\_OA assembly. 2015. [http://www.sheephapmap.org/CNV/UMD3\\_OA.tgz](http://www.sheephapmap.org/CNV/UMD3_OA.tgz). Accessed 1 June 2015 2015.

69. Korf I, Yandell M, Bedell J. BLAST. O'Reilly Media; 2003.

70. Fontanesi L, Martelli P, Beretti F, Riggio V, Dall'Olio S, Colombo M et al. An initial comparative map of copy number variations in the goat (*Capra hircus*) genome. *BMC Genomics*. 2010;11(1):639.

71. Li H, Durbin R. Fast and accurate short read alignment with Burrows–Wheeler transform. *Bioinformatics*. 2009;25(14):1754-60. doi:10.1093/bioinformatics/btp324.

72. Li H, Handsaker B, Wysoker A, Fennell T, Ruan J, Homer N et al. The Sequence Alignment/Map format and SAMtools. *Bioinformatics*. 2009;25(16):2078-9. doi:10.1093/bioinformatics/btp352.

73. Yoon S, Xuan Z, Makarov V, Ye K, Sebat J. Sensitive and accurate detection of copy number variants using read depth of coverage. *Genome Res*. 2009;19(9):1586-92. doi:gr.092981.109 [pii]

893 10.1101/gr.092981.109.  
894 74. Gay DM. Computing Science Technical Report No.153: Usage summary for selected optimization  
895 routines. 1990.  
896  
897  
898



899 **Table 1.** Characteristics of CNVs predicted true by the model (n=9,789) and filtered to remove  
900 artefacts.

| Variable                | Mean      | Median | Std dev    | Min   | Max       |
|-------------------------|-----------|--------|------------|-------|-----------|
| absl2r*                 | 0.54      | 0.43   | 0.36       | 0.25  | 3.47      |
| length (bp)             | 30,332.02 | 8,706  | 107,369.37 | 1,003 | 2,522,449 |
| Datapoints <sup>#</sup> | 14.99     | 9      | 23.91      | 3     | 446       |

901 \*absl2r is the absolute log<sub>2</sub> ratio of the CNV. # number of CGH array probes in the CNV.

902 **Table 2.** Cross platform verification results. Number of CNV calls that were verified and not verified.

| Verification platform |                   |                                                |                                           |                                     |
|-----------------------|-------------------|------------------------------------------------|-------------------------------------------|-------------------------------------|
|                       | 385K CGH<br>array | Illumina OvineSNP50<br>BeadChip - cnvPartition | Illumina OvineSNP50<br>BeadChip - DNACopy | Sequence analysis ~<br>10X coverage |
| Verified              | 17 (1.34%)        | 3 (0.04%)                                      | 101 (1.36%)                               | 714 (61.34%)                        |
| Not<br>verified       | 1,251             | 7,413                                          | 7,315                                     | 450                                 |
| Total                 | 1,268             | 7,416                                          | 7,416                                     | 1,164                               |

903

904 **Table 3.** Comparison between CNVRs observed in this study and CNVRs observed in the literature.

| Number of studies CNVR<br>observed in | Number of CNVR | Number of these CNVR identified in this<br>study (%) |
|---------------------------------------|----------------|------------------------------------------------------|
| 1                                     | 1,802          | 246 (13.7)                                           |
| 2                                     | 255            | 82 (32.2)                                            |
| 3                                     | 66             | 24 (36.4)                                            |
| 4                                     | 20             | 16 (80.0)                                            |
| 5                                     | 7              | 6 (85.7)                                             |
| 6                                     | 4              | 4 (100)                                              |

905

906 **Table 4.** Description of the pseudo-maximum likelihood derived mixture model for estimating copy

907 number in sequence data.

| Copy number | Distribution                     | Mixture weights                     | Mean                  | Variance                |
|-------------|----------------------------------|-------------------------------------|-----------------------|-------------------------|
| 0           | Half normal,<br>centered on zero | $\pi_0$                             | $\sqrt{2\pi}\sigma_0$ | $\sigma_0^2$            |
| 1           | Normal                           | $\pi_1$                             | $\frac{1}{2}\mu_2$    | $\frac{1}{2}\sigma_2^2$ |
| 2           | Normal                           | $1 - \pi_0 - \pi_1 - \pi_3 - \pi_4$ | $\mu_2$               | $\sigma_2^2$            |
| 3           | Normal                           | $\pi_3$                             | $\frac{3}{2}\mu_2$    | $\frac{3}{2}\sigma_2^2$ |
| 4           | Normal                           | $\pi_4$                             | $\frac{4}{2}\mu_2$    | $\frac{4}{2}\sigma_2^2$ |

908

909

910 **Table 5.** Starting values of parameters estimated by pseudo-maximum likelihood.

| Variable     | Starting value     | Lower bound | Upper bound |
|--------------|--------------------|-------------|-------------|
| $\mu_2$      | $\bar{\mu}$        | $-\infty$   | $\infty$    |
| $\sigma_2^2$ | $\bar{\sigma}_2^2$ | 0           | $\infty$    |
| $\sigma_0^2$ | 1.5                | 0.01        | $\infty$    |
| $\pi_0$      | 0.01               | 0           | 0.05        |
| $\pi_1$      | 0.025              | 0           | 0.2         |
| $\pi_3$      | 0.001              | 0           | 0.2         |
| $\pi_4$      | 0.001              | 0           | 0.05        |

911

912

913

914 **Figure 1. CNVR frequency across animals.**

915 **Figure 2. Number of CNVRs by chromosome length.** Labels correspond to chromosome number.

916 **Figure 3. Cumulative density plot of the distances separating CNVRs.** The red line reflects the  
 917 observed pairwise distances between CNVRs, while the blue line reflects the simulated (expected if  
 918 CNVRs are uniformly distributed in the genome) distances separating CNVRs.

919 **Figure 4. Selection of CGH array probes to cover OvineSNP50 BeadChip SNP positions.** Two  
 920 methods were used to select probe sets to cover SNPs. The first method (a) involved designing at  
 921 least one probe to cover the SNP position, with two probes in flanking regions. The second method  
 922 (b) involved designing a probe within the 300bp region surrounding the SNP and two probes in  
 923 flanking regions.

924

925 **Figure 5. Pedigree of International Mapping Flock (IMF) animals assayed on the Roche NimbleGen**  
 926 **2.1M CGH array.** Some animals (green) appear in more than one pedigree. Segment calls from  
 927 animals IMF66, IMF91, IMF95, IMF108 and IMF112 (red) were removed from the analysis due to  
 928 failed 2.1M CGH arrays.

929

930

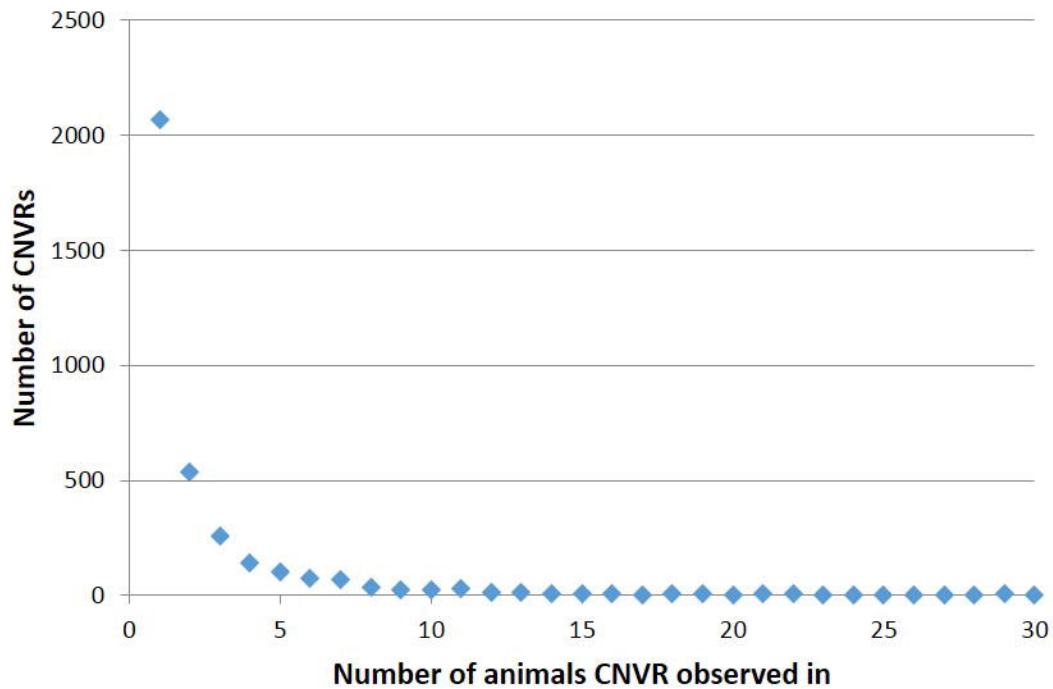

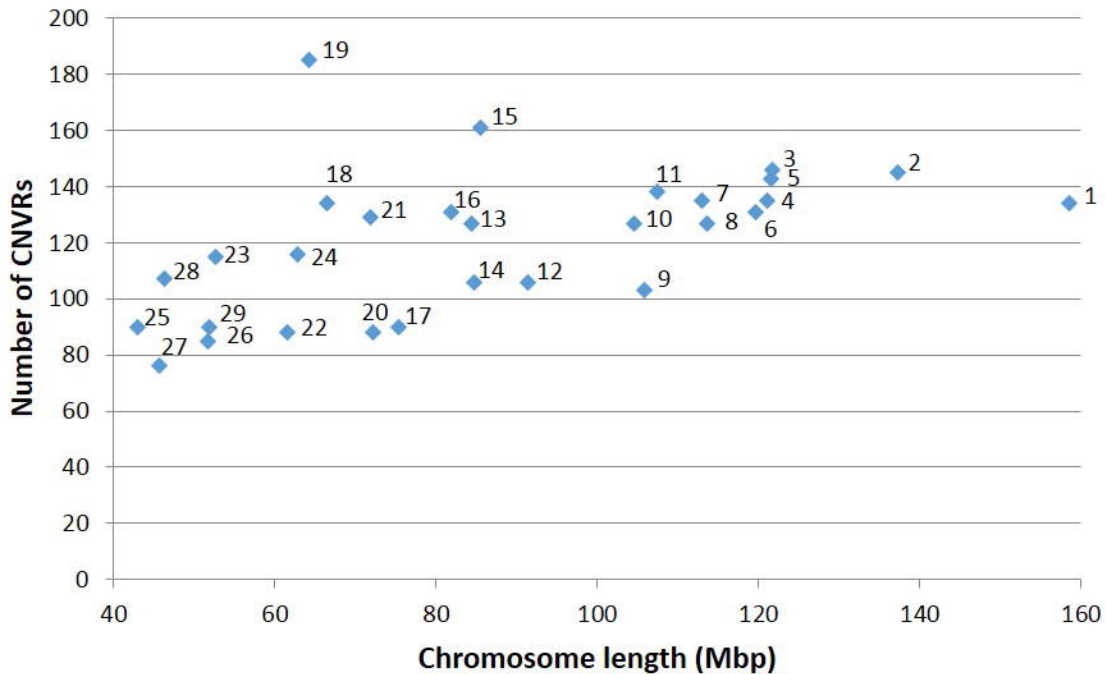

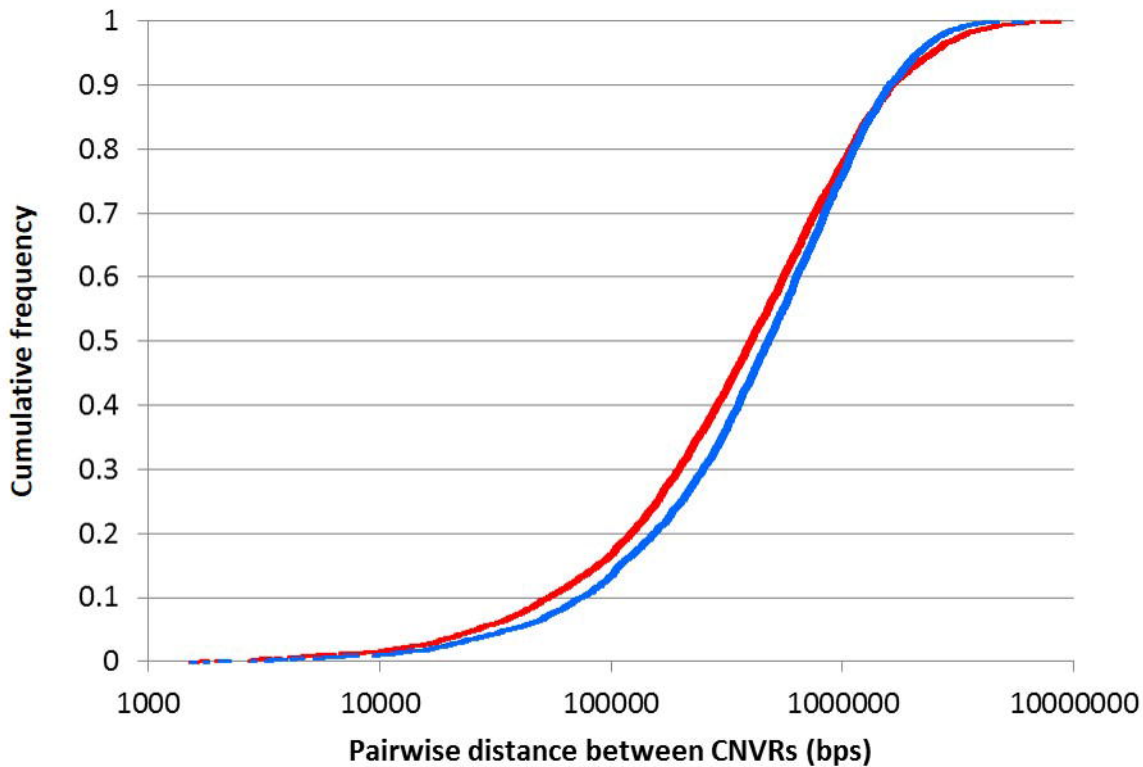

## 2a. Probe selection – method one

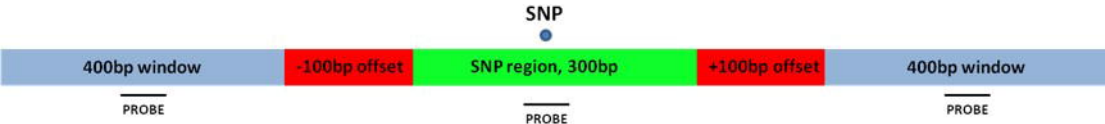

## 2b. Probe selection – method two

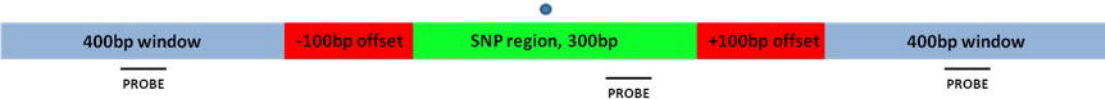

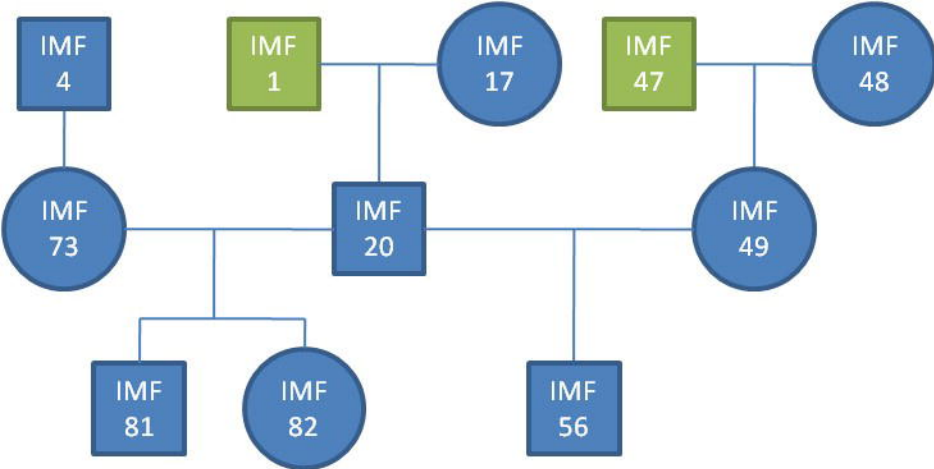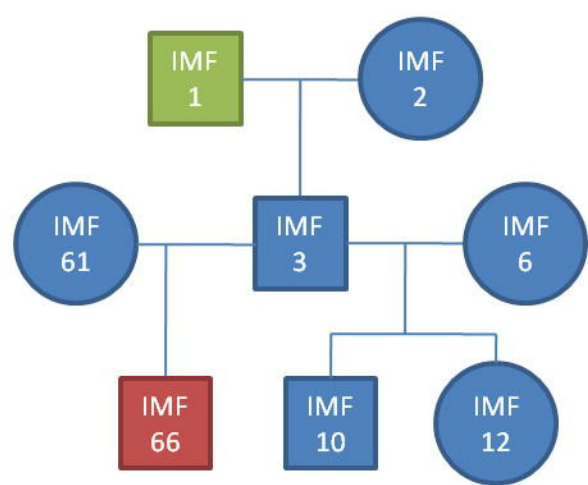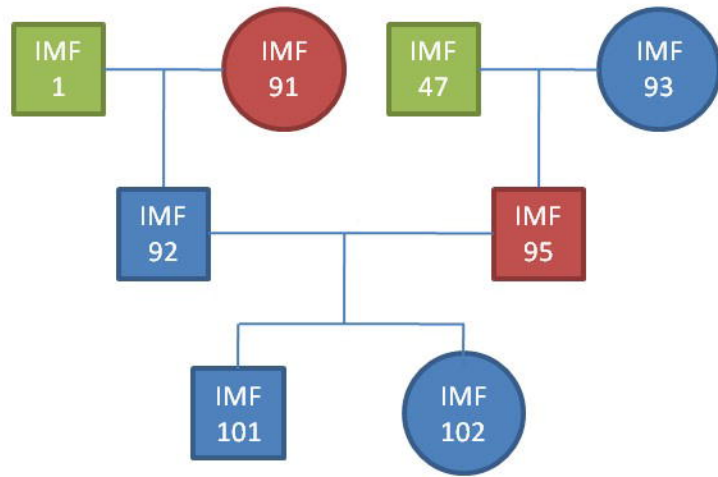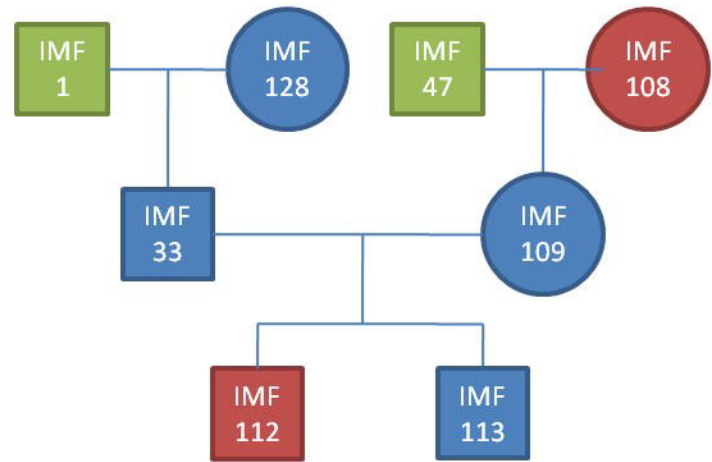

Source: http://biorxiv.org/content/10.1101/041475v1.full.pdf
